# Supplementary material for: Understanding the Role of Contrails and Contrail Cirrus in Climate Change: A Global Perspective
Source: Copernicus journal article supplement (doi:10.5194/egusphere-2024-127), 2024-01-22
Supplement: Supplementary file [file egusphere-2024-127-RC2-supplement.pdf]

1 Anonymous Review

2 April 18, 2024

3

4 **Understanding the Role of Contrails and Contrail Cirrus in Climate Change: A**  
5 **Global Perspective**

6

7 by Dharmendra Kumar Singh, Swarnali Sanyal, Donald J. Wuebbles

8 The topic of the paper is of high actual interest and well suited for ACP.

9 As stated in lines 100 ff, the paper aims to provide a comprehensive review of our  
10 understating of contrails... and to address the uncertainties....

11 Such a comprehensive review does not exist in the literature. It seems that the not all  
12 authors have extensive experiences in contrail research by themselves so many of their  
13 comments may raise critical discussion. The paper reads like a literature study in  
14 preparation of more specific own research by the authors on this topic.

15 But different from reviews by acknowledged experts, who like their own work most, this  
16 paper is rather unbiased in the selection of materials and assessments, and this is  
17 refreshing.

18 The coverage is quite good but can be improved. Here I have several additions and offer  
19 comments on detail, see below. The paper is (of course) mostly a collection of existing  
20 knowledge. The conclusions are not really surprisingly new. I found the comments on  
21 Machine Learning aspects particularly interesting (I think I should try to learn more about  
22 them). Section 7, "Research needs and gaps " is worthwhile to have though not  
23 objective in all parts and partly hard to validate because of incomplete explanations or  
24 citations. I think it is worthwhile to have estimated numbers on the magnitudes of  
25 uncertainty but presently these number are not well justified.

26

27 The review misses many important publications. That should be improved.

28 The paper is partly too long to keep me interested in all details, collects lot of materials.  
29 Still the paper is worth to read but it needs amendments before it can be published.

30 Such a long paper is hard to review, and I can give only a few specific comments. I  
31 would formulate many parts differently.

32

33 Abstract.

34 Line 12: The sentence "contrail cirrus enhances the impact of natural clouds on the  
35 climate" is misleading, because I read it first as if contrails would have no effect without

36 natural cirrus. But that is not the case. Better: Contrail cirrus is similar to natural cirrus in  
37 having an impact on climate.

38  
39 Then I would start a new sentence on the uncertainties – without “although” or “however”  
40 or “but”. Simply say that this paper discusses existing uncertainties

41  
42  
43 The statement “there are still unresolved questions” is trivial. There will be always  
44 unresolved questions. In fact, with further research more and new questions may likely  
45 arise. So, you should condition this sentence a bit more, like “presently the state of the  
46 art is insufficient to assess the magnitude of the climate impact of contrails, e.g. on  
47 surface temperature, and its error bounds with high confidence” – or similar.

48  
49 Line 16: add “mixing” as one of the issues.

50  
51 Line 56: this was known basically since long (see IPCC, 1999). Other reviews of  
52 relevance are, e.g. (Schumann, 1994; Sassen, 1997; Brasseur et al., 1998; Fahey and  
53 Schumann, 1999; Prather and Sausen, 1999; Sausen et al., 2005; Brasseur et al., 2016)

54  
55  
56 Line 68: what do you mean with atmospheric warming. It is correct for RF. But the ERF  
57 relates RF to the global mean surface temperature change.

58 In fact, perhaps you can discuss how reasonable it is to assess the impact of contrails in  
59 terms of global metrics. Contrails are local events, are short lived and have certainly a  
60 very small global mean surface temperature climate impact. Contrails warm mainly the  
61 upper troposphere, not so much the surface. Most contrails occur over continents with  
62 little chance or long-lived effects by heating the oceans. The regional effects are likely  
63 far larger than global effects and should be easier to be detected and quantified. And  
64 regional effects are of importance for the densely populated latitudes in the Northern  
65 hemisphere where most air traffic occurs.

66  
67 Line 78: sentence(s) incomplete and unclear.

68 Line 81 is biased to one team and one model type only. Other should be included.

69 Line 85: there is far more literature on this aspect.

70 Fig 1 caption. “Current best estimate..” The estimate is already no longer the last one.  
71 Several studies have added new estimates. I would suggest: “Climate forcing estimate  
72 as published in 2021” or similar.

73 Fig 2. misses to mention the importance of mixing of the jet exhaust gases with ambient  
74 air. Mixing controls early or late contrail formation and contrail lifetime (Lewellen and  
75 Lewellen, 1996; Gerz and Ehret, 1997; Sussmann and Gierens, 1999; Lewellen, 2014;  
76 Paoli and Shariff, 2016; Schumann and Heymsfield, 2017).

77

78

79

80 Line 152. These 2 references do not cover this topic sufficiently. There are many more. I  
81 see that you cite them later. But this line is irritating. See line 178. See e.g. Sassen  
82 (1997).

83

84 Line 197. Further new reference: (Märkl et al., 2024) .

85

86 Line 246, Contrail formation was observed far earlier. See (aufm Kampe, 1942; 1943;  
87 Weickmann, 1945; Brewer, 1946; Schumann and Wendling, 1990; Schumann, 1994;  
88 Busen and Schumann, 1995).

89 Line 256. The visible constraint were introduced earlier: Appleman (1953).

90

91 Line268 and Fig 4: a similar figure with a contrail spiral was given earlier in Fig. 11.2  
92 (Schumann, 2002).

93 Impressive contrail observations were also presented by Laken et al. (2012) and  
94 (Mannstein and Schumann, 2005).

95 Line 277: it is now pretty clear that the soot acts as condensation nucleus so that liquid  
96 droplets form which then freeze. The resultant ice particles likely do include the soot  
97 particles on which the water condensed. This does not exclude that some ice particle  
98 sublimate or that some soot remains dry throughout the contrail formation process, so  
99 that also dry soot is found inside contrails. See upcoming paper by Dischl et al.  
100 (Egusphere, to be published soon).

101 Lines 279 to 288 has been taken from Schumann and Heymsfield (2017), but the  
102 reference is missing.

103 Line 446: How do we know the current ranges of in-flight soot emission. Here you should  
104 cite papers by the team around Marc Stettler and Roger Teoh and colleagues (Teoh et  
105 al., 2019; Teoh et al., 2020a; Teoh et al., 2020b; Teoh et al., 2022a; Teoh et al., 2022b;  
106 Teoh et al., 2024a; Teoh et al., 2024b).

107 Lines 462 to 483: For the discussion of the impact of the initial contrail ice particle  
108 number concentration (and hence the soot emissions) on contrails the cross-section  
109 integrated optical extinction and hence on climate forcing you should cite details of the

110 study and explanation around Eq. (5) in Lewellen (2014). See also Section [17] in  
111 (Schumann et al., 2013).

112 Page 9: The summaries of Urbanek, Kärcher and Wolf read like abstracts from these  
113 papers. The review does not really combine these result critically with related results  
114 from other studies. This is a serious deficiency of this review and makes me uncertain  
115 whether this is an acceptable review.

116 Lines 516 ff: Sedimentation. This section misses citations of related literature. See, e.g.,  
117 Spichtinger and Gierens (2009)

118

119 Line 563 : 290 m/s, That is nearly speed of sound. I doubt that this value is correct (230  
120 m/s would sound more reasonable).

121

122 Lines 574 to 588: difficult to read. I have not understood what you want to say.

123 Line 606, replace 2016 by 2017.

124

125 Lines 617: the LES is of course far more expensive than a plume model and hard to  
126 apply globally. We need improved plume models, e.g., based on LES. By the way: Much  
127 work in this respect has been done by Unterstrasser (2016).

128 Line 732. The comparisons have been done in several follow-up papers of that cited  
129 here.

130 Line 780: You refer the age of 450 s without comments. To me 450 s is far too long.

131 Line 83: neither 10 nor 7.5  $\mu\text{m}$  is correct. That value varies by large factors.

132 Line 528 see earlier work, e.g., Sassen (1997).

133 Line 876: This was first discussed by Meerkötter et al. (1999).

134

135 Line 1122, Overlap effects. See (Schumann et al., 2021; Teoh et al., 2024a)

136

137 Line 1130. Ettenreich observed in 1915, but published in 1919.

138 Line 1153: Which reference do you refer to with Schumann, 2016?

139 Line 1158: See the GAIA data set (Teoh et al., 2024b).

140 Line 1163. See also the development of open access performance codes: (Poll, 2018;  
141 Poll and Schumann, 2022; 2024).

142 Line 1252: Limited literature exists". See, e.g., measurements of ice particles by the  
143 Geophysica aircraft at about 20 km height above tropical convection by measuring its  
144 own contrail (Schumann et al., 2017).

145 The paper by Myhre (2009) is certainly outdated There are several recent studies citing  
146 this paper.

147 Line 1299 How do you come to the value 55 %? It seems too large to me.

148 Linem1346: Contrail effects on climate will never be "fully" understood.

149 But also many other things are incompletely understood and nevertheless practically  
150 addressed. (See, e.g., smog in cities, observed in the 1950's and soon thereafter  
151 regulated by US federal institutions (was it ERL, I forgot the name) and later by ICAO.

152 Line 1359 Again: ERF is an insufficient climate metric because it does not account for  
153 regional (northern mid-latitudes) phenomena and other climate changes besides mean  
154 surface temperature.

155 Line 1503: As said before "Uncertainties persist". I must tell you: uncertainties will be  
156 there also in 100 years from now. The existence of uncertainties is not a sufficient  
157 argument to start mitigation actions soon. We only have to make sure that the actions  
158 reduce and not increase the climate effect. (It is like building a bridge over a river. The  
159 only thing which counts is that the likelihood that the bridge fails is sufficiently small to be  
160 acceptable. That problem was solved at least 2000 years before today, in spite of very  
161 large uncertainties. I suggest to carefully rethink about talking about uncertainties.

162

163 Chapter 7 "Uncertainties and Research Gaps" is certainly an important part of the paper.

164 Here many questions arise.

165 You provide number of the uncertainties in percentages. How are these number  
166 derived? That is unclear in most case. Please explain. I assume you will note: there are  
167 not only uncertainties but also uncertainties of how large the uncertainties are.

168 The quotes percentage values add (linearly) up to a total of more than 100 %. Please  
169 discuss.

170

171 Line 1284: The reference to Myhre et al. (2009) in assessing radiative transfer schemes  
172 is outdated. There are several new discussions. The key parameter is the shortwave to  
173 longwave ratio in contrail radiative forcing. E.g. Newinger and Burkhardt (2012) used an  
174 outdated Radiation scheme which strongly underestimated the SW/LW ratio. See  
175 discussion in Schumann and Graf (2013) and the important poster publication of  
176 Ponater et al. (2013).

177

178 Line 1287: add Forster et al. (2012).

179

180 Line 1311: Why is the effect of lifetime of lesser importance? I would expect it is very  
181 important (Lewellen, 2014)

182 Line 1327: add: well assimilated observation are important to setup good initial  
183 conditions for accurate weather predictions (Bauer et al., 2015).

184

185 Line 1359: ERF is not a measure for climate change in general. It is a measure of the  
186 RF impact on global mean surface temperature change only.

187 The bi-model size distribution of soot??? I am not aware of this. Please provide a  
188 reference. See Fig. 4 in (Schumann et al., 2002).

189

190 Line 1402: The word “fully” excludes everything, but see (Teoh et al., 2020a; Teoh et al.,  
191 2020b; Molloy et al., 2022; Teoh et al., 2022a; Martin Frias et al., 2024; Teoh et al.,  
192 2024a).

193 Line 1413: replace “more” by “larger”

194

195 Please note the following comment on Sausen and similar studies. It makes no sense to  
196 avoid formation of all contrails. That would imply that you also avoid cooling contrails  
197 and it overburdens air traffic management. It is sufficient and far more effective to avoid  
198 the warming contrails and to allow for (even more) cooling contrails. I gave several  
199 references for this above, e.g., (Molloy et al., 2022; Martin Frias et al., 2024).

200 Line 1498: Please delete the word “valuable”. Such an applause should come from the  
201 readers not from the authors.

202 Line 1505. “Uncertainties persist” that has been said often enough and does not get  
203 more correct by repeating.

204 Line 1519: replace Berndt by Bernd.

205 Lien1524 replace “the” by “for ”

206 In looking to the list of references:

207 Please consider the important work of (Bickel et al., 2020; Ponater et al., 2021; Bickel,  
208 2023)

209 Also (Duda et al., 2023).

210 Very important: (Iwabuchi et al., 2012)

211 and on ice supersaturation: (Ovarlez et al., 2000; Jensen et al., 2001; Ovarlez et al.,  
212 2002)

213 Line 1732 and elsewhere: Please list all co-authors.

214 Line 1916: What does the single “S” mean?

215 Line 1949: please set in capitals (here and elsewhere): MSG and SEVIRI

216 Line 1854 The method's name is RRUMS not drums.

217

218

219 Overall: A carefully revised version should become interesting, worthy to read, and  
220 acceptable.

221 References:

222

223 Appleman, H. (1953). The formation of exhaust contrails by jet aircraft. *Bull. Amer.*  
224 *Meteorol. Soc.*, 34, 14-20.

225 aufm Kampe, H. J. (1942). Kondensation und Sublimation in der oberen  
226 Troposphäre *Rep. Deutsche Luftfahrtforschung, Deutsche Forschungsanstalt für*  
227 *Segelflug, FB 1491*, <http://elib.dlr.de/107959/>, 60 pp.

228 aufm Kampe, H. J. (1943). Die Physik der Auspuffwolken hinter Flugzeugen. *Luftwissen*,  
229 10, 171-173, available at <https://ntrl.ntis.gov> and TIB Hannover, Germany.

230 Bauer, P., A. Thorpe, and G. Brunet (2015). The quiet revolution of numerical weather  
231 prediction. *Nature*, 525(7567), 47-55, doi: 10.1038/nature14956.

232 Bickel, M., M. Ponater, L. Bock, U. Burkhardt, and S. Reineke (2020). Estimating the  
233 effective radiative forcing of contrail cirrus. *J. Clim.*, 33, 1991-2005, doi:  
234 10.1175/JCLI-D-19-0467.1.

235 Bickel, M. (2023). *Climate Impact of Contrail Cirrus Rep.*, 133 pp, DLR and LMU Munich,  
236 DLR FB 2023-14.

237 Brasseur, G. P., R. A. Cox, D. Hauglustaine, I. Isaksen, J. Lelieveld, D. H. Lister, R.  
238 Sausen, U. Schumann, A. Wahner, and P. Wiesen (1998). European scientific  
239 assessment of the atmospheric effects of aircraft emissions. *Atmos. Env.*, 32(13),  
240 2329 - 2418.

241 Brasseur, G. P., M. Gupta, B. E. Anderson, S. Balasubramanian, S. Barrett, D. Duda, G.  
242 Fleming, P. M. Forster, J. Fuglestvedt, A. Gettelman, R. N. Halthore, S. D. Jacob,  
243 M. C. Jacobson, A. Khodayari, K.-N. Liou, M. T. Lund, R. C. Miake-Lye, P.  
244 Minnis, S. C. Olsen, J. E. Penner, R. Prinn, U. Schumann, H. B. Selkirk, A.  
245 Sokolov, N. Unger, P. Wolfe, H.-W. Wong, D. W. Wuebbles, B. Yi, P. Yang, and  
246 C. Zhou (2016). Impact of aviation on climate: FAA's Aviation Climate Change  
247 Research Initiative (ACCRI) Phase II. *Bull. Amer. Meteorol. Soc.*, 97(4), 561-583,  
248 doi: 10.1175/BAMS-D-13-00089.1.

249 Brewer, A. W. (1946). Condensation trails. *Weather*, 1(2), 34-40, doi: 10.1002/j.1477-  
250 8696.

251 Busen, R., and U. Schumann (1995). Visible contrail formation from fuels with different  
252 sulfur contents. *Geophys. Res. Lett.*, 22(11), 1357-1360, doi:  
253 10.1029/95GL01312.

254 Duda, D. P., W. L. Smith Jr., S. Bedka, D. Spangenberg, T. Chee, and P. Minnis (2023).  
255 Impact of COVID-19-related air traffic reductions on the coverage and radiative

256 effects of linear persistent contrails over conterminous United States and  
 257 surrounding oceanic routes. *J. Geophys. Res.*, 128, e2022JD037554,  
 258 <https://doi.org/10.1029/2022JD037554>.

259 Fahey, D. W., and U. Schumann (1999). Aviation-Produced Aerosols and Cloudiness. in  
 260 *Aviation and the Global Atmosphere. A Special Report of IPCC Working Groups I*  
 261 *and III*, edited by J. E. Penner, D. H. Lister, D. J. Griggs, D. J. Dokken and M.  
 262 McFarland, pp. 65-120, Cambridge University Press, New York.

263 Forster, L., C. Emde, S. Unterstrasser, and B. Mayer (2012). Effects of three-  
 264 dimensional photon transport on the radiative forcing of realistic contrails. *J.*  
 265 *Atmos. Sci.*, 69(July), 2243-2255, doi: 10.1175/JAS-D-11-0206.1.

266 Gerz, T., and T. Ehret (1997). Wingtip vortices and exhaust jets during the jet regime of  
 267 aircraft wakes. *Aerosp. Sci. Techn.*, 1(7), 463-474.

268 Iwabuchi, H., P. Yang, K. N. Liou, and P. Minnis (2012). Physical and optical properties  
 269 of persistent contrails: Climatology and interpretation. *J. Geophys. Res.*, 117,  
 270 D06215, doi: 10.1029/2011JD017020.

271 Jensen, E. J., O. B. Toon, S. A. Vay, J. Ovarlez, R. May, P. Bui, C. H. Twohy, B.  
 272 Gandrud, R. F. Pueschel, and U. Schumann (2001). Prevalence of ice-  
 273 supersaturated regions in the upper troposphere: Implications for optically thin ice  
 274 cloud formation. *J. Geophys. Res.*, 106, 17253-17266, doi:  
 275 10.1029/2000JD900526.

276 Laken, B. A., E. Palla, D. R. Kniveton, C. J. R. Williams, and D. A. Kilham (2012).  
 277 Contrails developed under frontal influences of the North Atlantic. *J. Geophys.*  
 278 *Res.*, 117(11), D11201, doi: 10.1029/2011JD017019.

279 Lewellen, D. C., and W. S. Lewellen (1996). Large-eddy simulations of the vortex-pair  
 280 breakup in aircraft wakes. *AIAA J.*, 34, 2337-2345.

281 Lewellen, D. C. (2014). Persistent contrails and contrail cirrus. Part II: Full lifetime  
 282 behavior. *J. Atmos. Sci.*, 71, 4420-4438, doi: 10.1175/JAS-D-13-0317.1.

283 Mannstein, H., and U. Schumann (2005). Aircraft induced contrail cirrus over Europe.  
 284 *Meteorol. Z.*, 14(4), 549 - 554, 10.1127/0941-2948/2005/0058.

285 Märkl, R. S., C. Voigt, D. Sauer, R. K. Dischl, S. Kaufmann, T. Harlaß, V. Hahn, A.  
 286 Roiger, C. Weiß-Rehm, U. Burkhardt, U. Schumann, A. Marsing, M. Scheibe, A.  
 287 Dörnbrack, C. Renard, M. Gauthier, P. Swann, P. Madden, D. Luff, R. Sallinen, T.  
 288 Schripp, and P. L. Clercq (2024). Powering aircraft with 100% sustainable  
 289 aviation fuel reduces ice crystals in contrails. *Atmos. Chem. Phys.*, 24, 3813-  
 290 3837, <https://acp.copernicus.org/articles/24/3813/2024/>.

291 Martin Frias, A., M. L. Shapiro, Z. Engberg, R. Zopp, M. Soler, and M. E. J. Stettler  
 292 (2024). Feasibility of contrail avoidance in a commercial flight planning system: an  
 293 operational analysis. *Environ. Res.: Infrastruct. Sustain.*, 4, doi: 10.1088/2634-  
 294 4505/ad310c, <https://iopscience.iop.org/article/10.1088/2634-4505/ad310c>.

295 Meerkötter, R., U. Schumann, P. Minnis, D. R. Doelling, T. Nakajima, and Y. Tsushima  
 296 (1999). Radiative forcing by contrails. *Ann. Geophysicae*, 17(8), 1080-1094, doi:  
 297 10.1007/s00585-999-1080-7.



298 Molloy, J., R. Teoh, S. Harty, G. Koudis, U. Schumann, I. Poll, and M. E. J. Stettler  
 299 (2022). Design principles for a contrail minimizing trial in the North Atlantic.  
 300 *Aerospace*, *submitted*.

301 Myhre, G., M. Kvalevag, G. Rädcl, J. Cook, K. P. Shine, H. Clark, F. Karcher, K.  
 302 Markowicz, A. Karda, O. Wolkenberg, Y. Balkanski, M. Ponater, P. Forster, A.  
 303 Rap, and R. Rodriguez de Leon (2009). Intercomparison of radiative forcing  
 304 calculations of stratospheric water vapour and contrails. *Meteorol. Z.*, *18*(6), 585-  
 305 596, doi: 10.1127/0941-2948/2009/0411.

306 Newinger, C., and U. Burkhardt (2012). Sensitivity of contrail cirrus radiative forcing to  
 307 air traffic scheduling. *J. Geophys. Res.*, *117*, D10205, doi:  
 308 10.1029/2011JD016736.

309 Ovarlez, J., P. van Velthoven, G. Sachse, S. Vay, H. Schlager, and H. Ovarlez (2000).  
 310 Comparison of water vapor measurements from POLINAT2 with ECMWF  
 311 analyses in high humidity conditions. *J. Geophys. Res.*, *105*(D3), 3737-3744.

312 Ovarlez, J., J. F. Gayet, K. Gierens, J. Ström, H. Ovarlez, F. Auriol, R. Busen, and U.  
 313 Schumann (2002). Water vapor measurements inside cirrus clouds in northern  
 314 and southern hemispheres during INCA. *Geophys. Res. Lett.*, *29*(16), 60-61 - 60-  
 315 64, doi: 10.1029/2001gl014440.

316 Paoli, R., and K. Shariff (2016). Contrail modeling and simulation. *Annu. Rev. Fluid*  
 317 *Mech.*, *48*, 393–427, doi: 10.1146/annurev-fluid-010814-013619.

318 Poll, D. I. A. (2018). On the relationship between non-optimum operations and fuel  
 319 requirement for large civil transport aircraft, with reference to environmental  
 320 impact and contrail avoidance strategy. *Aero. J.*, *122*(1258), 1827-1870, doi:  
 321 10.1017/aer.2018.121

322 Poll, D. I. A., and U. Schumann (2022). An estimation method for the fuel burn and other  
 323 performance characteristics of civil transport aircraft. Part 3 Generalisation to  
 324 cover climb, descent and holding. *Aero. J.*, *submitted*.

325 Poll, D. I. A., and U. Schumann (2024). On the conditions for absolute minimum fuel  
 326 burn for turbofan powered, civil transport aircraft and a simple model for wave  
 327 drag. *Aero. J.*, *online*, <https://doi.org/10.1017/aer.2024.10>.

328 Ponater, M., S. Dietmüller, C. Frömming, and L. Bock (2013). The shortwave to  
 329 longwave ratio in contrail radiative forcing as evident in two radiation schemes  
 330 used for global GCMs. In *13th EMS annual meeting, 9.-13. Sept. 2013, Reading,*  
 331 *UK.*, edited.

332 Ponater, M., M. Bickel, L. Bock, and U. Burkhardt (2021). Towards determining the  
 333 contrail cirrus efficacy. *Aerospace*, *8*(42), 1-10, doi: 10.3390/aerospace8020042.

334 Prather, M., and R. Sausen (1999). Potential climate change from aviation. in *Aviation*  
 335 *and the Global Atmosphere. A Special Report of IPCC Working Groups I and III*,  
 336 edited by J. E. Penner, D. H. Lister, D. J. Griggs, D. J. Dokken and N. Mc  
 337 Farland, pp. 185-215, Cambridge University Press, Cambridge, UK.

338 Sassen, K. (1997). Contrail-cirrus and their potential for regional climate change. *Bull.*  
 339 *Amer. Meteorol. Soc.*, *78*(9), 1885-1903.

340 Sausen, R., I. Isaksen, D. Hauglustaine, V. Grewe, D. S. Lee, G. Myhre, M. O. Köhler,  
 341 G. Pitari, U. Schumann, F. Stordal, and C. Zerefos (2005). Aviation radiative

342 forcing in 2000: An update on IPCC (1999). *Meteorol. Z.*, 14, 555 - 561,  
343 10.1127/0941-2948/2005/0049.

344 Schumann, U., and P. Wendling (1990). Determination of contrails from satellite data  
345 and observational results. In: Air Traffic and the Environment – Background,  
346 Tendencies and Potential Global Atmospheric Effects. U. Schumann (Ed.),  
347 Lecture Notes in Engineering. *Springer Berlin*, 138-153.

348 Schumann, U. (1994). On the effect of emissions from aircraft engines on the state of  
349 the atmosphere. *Ann. Geophysicae*, 12(5), 365-384.

350 Schumann, U. (2002). Contrail Cirrus. in *Cirrus*, edited by D. K. Lynch, K. Sassen, D.  
351 O’C. Starr and G. Stephens, pp. 231-255, Oxford Univ. Press, Oxford.

352 Schumann, U., F. Arnold, R. Busen, J. Curtius, B. Kärcher, A. Petzold, H. Schlager, F.  
353 Schröder, and K. H. Wohlfrom (2002). Influence of fuel sulfur on the composition  
354 of aircraft exhaust plumes: The experiments SULFUR 1-7. *J. Geophys. Res.*,  
355 107(D15), 4247, doi: 10.1029/2001JD000813.

356 Schumann, U., and K. Graf (2013). Aviation-induced cirrus and radiation changes at  
357 diurnal timescales. *J. Geophys. Res.*, 118(5), 2404-2421, doi:  
358 10.1002/jgrd.50184.

359 Schumann, U., P. Jeßberger, and C. Voigt (2013). Contrail ice particles in aircraft wakes  
360 and their climatic importance. *Geophys. Res. Lett.*, 40(11), 2867-2872 doi:  
361 10.1002/grl.50539.

362 Schumann, U., and A. Heymsfield (2017). On the lifecycle of individual contrails and  
363 contrail cirrus. *Meteor. Monogr.*, 58(3), 3.1-3.24, doi:  
364 10.1175/AMSMONOGRAPHS-D-16-0005.1.

365 Schumann, U., C. Kiemle, H. Schlager, R. Weigel, S. Borrmann, F. D’Amato, M. Krämer,  
366 R. Matthey, A. Protat, C. Voigt, and C. M. Volk (2017). Long-lived contrails and  
367 convective cirrus above the tropical tropopause. *Atmos. Chem. Phys.*, 17, 2311-  
368 2346, doi: 10.5194/acp-17-2311-2017.

369 Schumann, U., I. Poll, R. Teoh, R. Koelle, E. Spinielli, J. Molloy, G. S. Koudis, R.  
370 Baumann, L. Bugliaro, M. Stettler, and C. Voigt (2021). Air traffic and contrail  
371 changes over Europe during COVID-19: A model study. *Atmos. Chem. Phys.*,  
372 21(10), 7429–7450, doi: 10.5194/acp-21-7429-2021.

373 Spichtinger, P., and K. M. Gierens (2009). Modelling of cirrus clouds – Part 1a: Model  
374 description and validation. *Atmos. Chem. Phys.*, 9, 685–706, doi: 10.5194/acp-9-  
375 685-2009.

376 Sussmann, R., and K. Gierens (1999). Lidar and numerical studies on the different  
377 evolution of vortex pair and secondary wake in young contrails. *J. Geophys. Res.*,  
378 104, 2131-2142.

379 Teoh, R., M. E. J. Stettler, A. Majumdar, U. Schumann, B. Graves, and A. Boies (2019).  
380 A methodology to relate black carbon particle number and mass emissions. *J.*  
381 *Aeros. Sci.*, 132(June), 44-59, doi: 10.1016/j.jaerosci.2019.03.006.

382 Teoh, R., U. Schumann, A. Majumdar, and M. E. J. Stettler (2020a). Mitigating the  
383 climate forcing of aircraft contrails by small-scale diversions and technology  
384 adoption. *Environmental Science and Technology*, 54(5), 2941–2950, doi:  
385 10.1021/acs.est.9b05608.

- 386 Teoh, R., U. Schumann, and M. E. J. Stettler (2020b). Beyond contrail avoidance:  
387 Efficacy of flight altitude changes to minimise contrail climate forcing. *Aerospace*,  
388 7, (9), 121, doi: 10.3390/aerospace7090121.
- 389 Teoh, R., U. Schumann, E. Gryspeerd, M. Shapiro, J. Molloy, G. Koudis, C. Voigt, and  
390 M. E. J. Stettler (2022a). Aviation contrail climate effects in the North Atlantic from  
391 2016-2021. *Atmos. Chem. Phys.*, 22, 10919–10935, [https://doi.org/10.5194/acp-](https://doi.org/10.5194/acp-22-10919-2022)  
392 [22-10919-2022](https://doi.org/10.5194/acp-22-10919-2022).
- 393 Teoh, R., U. Schumann, C. Voigt, T. Schripp, M. Shapiro, Z. Engberg, J. Molloy, G.  
394 Koudis, and M. E. J. Stettler (2022b). Targeted use of sustainable aviation fuel to  
395 maximise climate benefits. *Environmental Science and Technology*, 56(23),  
396 17246–17255, <https://doi.org/10.1021/acs.est.2c05781>.
- 397 Teoh, R., Z. Engberg, U. Schumann, C. Voigt, M. Shapiro, S. Rohs, and M. E. J. Stettler  
398 (2024a). Global aviation contrail climate effects from 2019 to 2021. *Atmos. Chem.*  
399 *Phys.*, *accepted*, <https://doi.org/10.5194/egusphere-2023-1859>.
- 400 Teoh, R., Z. Engberg, M. Shapiro, L. Dray, and M. E. J. Stettler (2024b). The high-  
401 resolution Global Aviation emissions Inventory based on ADS-B (GAIA) for 2019–  
402 2021. *Atmos. Chem. Phys.*, 24, 725-744,  
403 <https://acp.copernicus.org/articles/24/725/2024/>.
- 404 Unterstrasser, S. (2016). Properties of young contrails – a parametrisation based on  
405 large-eddy simulations. *Atmos. Chem. Phys.*, 16, 2059-2082, doi: 10.5194/acp-  
406 16-2059-2016.
- 407 Weickmann, H. (1945). Formen und Bildung atmosphärischer Eiskristalle. *Beitr. Phys.*  
408 *Atmos. (Contr. Atm. Phys.)*, 28, 12-52.
- 409
